# Supplementary material for: Gene Prediction in Metagenomic Fragments with Deep Learning
Source: Biomed Res Int. 2017 Nov 8;2017:4740354. doi: 10.1155/2017/4740354 (PMC5698827; doi:10.1155/2017/4740354)
Supplement: Supplementary file 1 — Table S1. Genomes information in training dataset. Table S2. Genomes information in testing dataset. Table S3. TPR, PPV and F1 score of Meta-MFDL, Meta-MFSVM, Orphelia, FragGeneScan, MGC and MetaGUN on the TesData700 independent testing dataset. Table S4. TPR, PPV and F1 score of Meta-MFDL, Meta-MFSVM, Orphelia, FragGeneScan, MGC and MetaGUN on the TesData120 independent testing dataset. Table S5. Results of Meta-MFDL with different training data size. [file 4740354.f1.xlsx]

## Sheet: Table S1
Table S1. Genomes information in training dataset
Species	GenBank accession number	GC content	Size（Mb）	Lineage
Thermotoga maritima MSB8	NC_000853	46.21	1.86	Bacteria[7918]; Thermotogae[28]; Thermotogae[27]; Thermotogales[18]; Thermotogaceae[12]; Thermotoga[7]; Thermotoga maritima[1];Thermotoga maritima MSB8[1]
Aeropyrum pernix K1	NC_000854	56.32	1.67	Archaea[573]; Crenarchaeota[73]; Thermoprotei[58]; Desulfurococcales[18]; Desulfurococcaceae[14]; Aeropyrum[2]; Aeropyrum pernix[1]; Aeropyrum pernix K1[1]
Pyrococcus abyssi GE5	NC_000868	44.71	1.76	Archaea[516]; Euryarchaeota[322]; Thermococci[25]; Thermococcales[25]; Thermococcaceae[24]; Pyrococcus[5]; Pyrococcus abyssi[1];Pyrococcus abyssi GE5[1]
Synechocystis sp. PCC 6803	NC_000869	47.35	3.95	Bacteria[7918]; Cyanobacteria[113]; Oscillatoriophycideae[64]; Chroococcales[28]; Synechocystis[1]; Synechocystis sp. PCC 6803[1]
Methanothermobacter thermautotrophicus str. Delta H	NC_000870	49.52	1.75	Archaea[516]; Euryarchaeota[322]; Methanobacteria[22]; Methanobacteriales[22]; Methanobacteriaceae[21]; Methanothermobacter[3];Methanothermobacter thermautotrophicus[1]; Methanothermobacter thermautotrophicus str. Delta H[1]
Aquifex aeolicus	NC_000871	43.51	1.55	Bacteria[7918]; Aquificae[17]; Aquificae[17]; Aquificales[14]; Aquificaceae[7]; Aquifex[1]; Aquifex aeolicus[1]
Deinococcus radiodurans	NC_000872	66.84	3.24	Bacteria[7918]; Deinococcus-Thermus[47]; Deinococci[46]; Deinococcales[23]; Deinococcaceae[22]; Deinococcus[22]; Deinococcus radiodurans[1]
Borrelia burgdorferi B31	NC_000873	28.18	1.52	Bacteria[7918]; Spirochaetes[84]; Spirochaetales[50]; Borreliaceae[20]; Borreliella[9]; Borreliella burgdorferi[1]; Borrelia burgdorferi B31[1]
Ureaplasma parvum serovar 3 str. ATCC 700970	NC_000874	25.51	0.75	Bacteria[7918]; Tenericutes[142]; Mollicutes[142]; Mycoplasmataceae[85]; Ureaplasma[4]; Ureaplasma parvum[1]; Ureaplasma parvum serovar 3[1]; Ureaplasma parvum serovar 3 str. ATCC 700970[1]
Campylobacter jejuni	NC_000875	30.45	1.68	Bacteria[7918]; Proteobacteria[2718]; Epsilonproteobacteria[79]; Campylobacterales[73]; Campylobacteraceae[36]; Campylobacter[23]; Campylobacter jejuni[1]
Xylella fastidiosa 9a5c	NC_000876	52.64	2.73	Bacteria[7918]; Proteobacteria[2718]; Gammaproteobacteria[1183]; Xanthomonadales[82]; Xanthomonadaceae[66]; Xylella[1]; Xylella fastidiosa[1]; Xylella fastidiosa 9a5c[1]
Vibrio cholerae O1 biovar El Tor str. N16961	NC_000877	47.48	4.01	Bacteria[7918]; Proteobacteria[2718]; Gammaproteobacteria[1183]; Vibrionales[101]; Vibrionaceae[100]; Vibrio[66]; Vibrio cholerae[1]; Vibrio cholerae O1[1]; Vibrio cholerae O1 biovar El Tor[1]; Vibrio cholerae O1 biovar El Tor str. N16961[1]
Thermoplasma acidophilum DSM 1728	NC_000878	46.02	1.57	Archaea[516]; Euryarchaeota[322]; Thermoplasmata[23]; Thermoplasmatales[15]; Thermoplasmataceae[2]; Thermoplasma[2];Thermoplasma acidophilum[1]; Thermoplasma acidophilum DSM 1728[1]
Chlamydia muridarum	NC_000879	40.33	1.07	Bacteria[7918]; Chlamydiae[25]; Chlamydiales[23]; Chlamydiaceae[13]; Chlamydia/Chlamydophila group[13]; Chlamydia[10]; Chlamydia muridarum[1]
Lactococcus lactis subsp. lactis Il1403	NC_000880	35.31	2.37	Bacteria[7918]; Firmicutes[1539]; Bacilli[805]; Lactobacillales[356]; Streptococcaceae[74]; Lactococcus[5]; Lactococcus lactis[1]; Lactococcus lactis subsp. lactis[1]; Lactococcus lactis subsp. lactis Il1403[1]
Pasteurella multocida subsp. multocida str. Pm70	NC_000881	40.42	2.26	Bacteria[7918]; Proteobacteria[2718]; Gammaproteobacteria[1183]; Pasteurellales[41]; Pasteurellaceae[41]; Pasteurella[4]; Pasteurella multocida[1]; Pasteurella multocida subsp. multocida[1]; Pasteurella multocida subsp. multocida str. Pm70[1]
Mesorhizobium loti MAFF303099	NC_000882	62.46	7.59	Bacteria[7918]; Proteobacteria[2718]; Alphaproteobacteria[828]; Rhizobiales[257]; Phyllobacteriaceae[26]; Mesorhizobium[11]; Mesorhizobium loti[1]; Mesorhizobium loti MAFF303099[1]
Caulobacter vibrioides	NC_000883	67.51	4.24	Bacteria[7918]; Proteobacteria[2718]; Alphaproteobacteria[828]; Caulobacterales[21]; Caulobacteraceae[21]; Caulobacter[4]; Caulobacter vibrioides[1]
Dehalococcoides mccartyi	NC_000884	47.24	1.42	Bacteria[7918]; Chloroflexi[51]; Dehalococcoidia[14]; Dehalococcoidales[2]; Dehalococcoidaceae[2]; Dehalococcoides[2]; Dehalococcoides mccartyi[1]
Haemophilus ducreyi 35000HP	NC_000885	38.25	1.74	Bacteria[7918]; Proteobacteria[2718]; Gammaproteobacteria[1183]; Pasteurellales[41]; Pasteurellaceae[41]; Haemophilus[11]; [Haemophilus] ducreyi[1]; Haemophilus ducreyi 35000HP[1]
Legionella pneumophila subsp. pneumophila str. Philadelphia	NC_000886	38.24	3.39	Bacteria[7918]; Proteobacteria[2718]; Gammaproteobacteria[1183]; Legionellales[56]; Legionellaceae[48]; Legionella[43]; Legionella pneumophila[1]
Mycobacterium avium subsp. paratuberculosis K-10	NC_000887	69.31	4.83	Bacteria[7918]; Actinobacteria[1198]; Actinobacteria[1134]; Corynebacteriales[257]; Mycobacteriaceae[87]; Mycobacterium[86]; Mycobacterium avium complex (MAC)[8]; Mycobacterium avium[1]; Mycobacterium avium subsp. paratuberculosis[1]; Mycobacterium avium subsp. paratuberculosis
Neisseria gonorrhoeae FA 1090	NC_000888	52.74	2.15	Bacteria[7918]; Proteobacteria[2718]; Betaproteobacteria[435]; Neisseriales[58]; Neisseriaceae[32]; Neisseria[17]; Neisseria gonorrhoeae[1]; Neisseria gonorrhoeae FA 1090[1]
Porphyromonas gingivalis W83	NC_000889	48.35	2.34	Bacteria[7918]; Bacteroidetes[581]; Bacteroidia[208]; Bacteroidales[206]; Porphyromonadaceae[51]; Porphyromonas[15]; Porphyromonas gingivalis[1]; Porphyromonas gingivalis W83[1]
Treponema denticola ATCC 35405	NC_000890	37.91	2.84	Bacteria[7918]; Spirochaetes[84]; Spirochaetales[50]; Spirochaetaceae[30]; Treponema[19]; Treponema denticola[1]; Treponema denticola ATCC 35405[1]
Coxiella burnetii	NC_000891	42.57	2.02	Bacteria[7918];Proteobacteria[2718];Gammaproteobacteria[1183];Legionellales[56];Coxiellaceae[8]; Coxiella[3]; Coxiella burnetii[1]
Methylococcus capsulatus str. Bath	NC_000892	63.63	3.31	Bacteria[7918]; Proteobacteria[2718]; Gammaproteobacteria[1183]; Methylococcales[24]; Methylococcaceae[23]; Methylococcus[1]; Methylococcus capsulatus[1]; Methylococcus capsulatus str. Bath[1]
Clostridium acetobutylicum	NC_000893	30.89	4.13	Bacteria[7918]; Firmicutes[1539]; Clostridia[545]; Clostridiales[459]; Clostridiaceae[84]; Clostridium[55]; Clostridium acetobutylicum[1]
Sinorhizobium meliloti 1021	NC_000894	62.16	6.69	Bacteria[7918]; Proteobacteria[2718]; Alphaproteobacteria[828]; Rhizobiales[257]; Rhizobiaceae[47]; Sinorhizobium/Ensifer group[9];Sinorhizobium[6]; Sinorhizobium meliloti[1]; Sinorhizobium meliloti 1021[1]
Rickettsia conorii str. Malish 7	NC_000895	32.42	1.27	Bacteria[7918]; Proteobacteria[2718]; Alphaproteobacteria[828]; Rickettsiales[85]; Rickettsiaceae[37]; Rickettsieae[36]; Rickettsia[34]; spotted fever group[28]; Rickettsia conorii[1]; Rickettsia conorii str. Malish 7[1]
Yersinia pestis CO92	NC_000896	47.61	3.94	Bacteria[8418]; Proteobacteria[2918]; Gammaproteobacteria[1255]; Enterobacteriales[245];Enterobacteriaceae[245]; Yersinia[18]; Yersinia pseudotuberculosis complex[4]; Yersinia pestis[1]
Streptomyces avermitilis MA-4680 = NBRC 14893	NC_000897	70.68	9.12	Bacteria[7918]; Actinobacteria[1198]; Actinobacteria[1134]; Streptomycetales[247]; Streptomycetaceae[247]; Streptomyces[229];Streptomyces avermitilis[1]; Streptomyces avermitilis MA-4680 = NBRC 14893[1]
Salmonella enterica subsp. enterica serovar Typhimurium str	NC_000898	52.22	4.95	Bacteria[7918]; Proteobacteria[2718]; Gammaproteobacteria[1183]; Enterobacteriales[232]; Enterobacteriaceae[232]; Salmonella[2];Salmonella enterica[1]; Salmonella enterica subsp. enterica[1];
Listeria innocua Clip11262	NC_000899	37.35	3.13	Bacteria[7918]; Firmicutes[1539]; Bacilli[805]; Bacillales[448]; Listeriaceae[21]; Listeria[18]; Listeria innocua[1]; Listeria innocua Clip11262[1]
Nostoc sp. PCC 7120	NC_000900	41.22	7.21	Bacteria[7918]; Cyanobacteria[113]; Nostocales[27]; Nostocaceae[16]; Nostoc[3]; Nostoc sp. PCC 7120[1]
Pyrobaculum aerophilum	NC_000901	51.44	2.24	Archaea[570]; Crenarchaeota[73]; Thermoprotei[58]; Thermoproteales[22];Thermoproteaceae[19]; Pyrobaculum[8]; Pyrobaculum aerophilum[1]
Fusobacterium nucleatum subsp. nucleatum ATCC 25586	NC_000902	27.21	2.17	Bacteria[7918]; Fusobacteria[31]; Fusobacteriales[31]; Fusobacteriaceae[16]; Fusobacterium[12]; Fusobacterium nucleatum[1];Fusobacterium nucleatum subsp. nucleatum[1]; Fusobacterium nucleatum subsp. nucleatum ATCC 25586[1]
Methanopyrus kandleri AV19	NC_000903	61.22	1.69	Archaea[570]; Euryarchaeota[366]; Methanopyri[1]; Methanopyrales[1]; Methanopyraceae[1];Methanopyrus[1]; Methanopyrus kandleri[1]
Methanosarcina acetivorans C2A	NC_000904	42.71	5.75	Archaea[516]; Euryarchaeota[322]; Methanomicrobia[52]; Methanosarcinales[27]; Methanosarcinaceae[19]; Methanosarcina[11];Methanosarcina acetivorans[1]; Methanosarcina acetivorans C2A[1]
Caldanaerobacter subterraneus subsp. tengcongensis MB4	NC_000905	37.63	2.69	Bacteria[7918]; Firmicutes[1539]; Clostridia[545]; Thermoanaerobacterales[47]; Thermoanaerobacteraceae[26]; Caldanaerobacter[1];Caldanaerobacter subterraneus[1]; Caldanaerobacter subterraneus subsp. tengcongensis[1]; Caldanaerobacter subterraneus subsp. tengcongensis MB4[1]
Colwellia psychrerythraea	NC_000906	38.04	5.37	Bacteria[7918]; Proteobacteria[2718]; Gammaproteobacteria[1183]; Alteromonadales[127]; Colwelliaceae[6]; Colwellia[3]; Colwellia psychrerythraea[1]
Ruegeria pomeroyi DSS-3	NC_000907	64.05	4.62	Bacteria[7918]; Proteobacteria[2718]; Alphaproteobacteria[828]; Rhodobacterales[195]; Rhodobacteraceae[171]; Ruegeria[8]; Ruegeria pomeroyi[1]; Ruegeria pomeroyi DSS-3[1]
Thermosynechococcus elongatus BP-1	NC_000908	53.94	2.59	Bacteria[7918]; Cyanobacteria[113]; Oscillatoriophycideae[64]; Chroococcales[28]; Thermosynechococcus[2]; Thermosynechococcus elongatus[1]; Thermosynechococcus elongatus BP-1[1]
Streptococcus agalactiae 2603V/R	NC_000909	35.61	2.16	Bacteria[7918]; Firmicutes[1539]; Bacilli[805]; Lactobacillales[356]; Streptococcaceae[74]; Streptococcus[69]; Streptococcus agalactiae[1];Streptococcus agalactiae serogroup V[1]; Streptococcus agalactiae 2603V/R[1]
Oceanobacillus iheyensis HTE831	NC_000910	35.72	3.63	Bacteria[7918]; Firmicutes[1539]; Bacilli[805]; Bacillales[448]; Bacillaceae[218]; Oceanobacillus[8]; Oceanobacillus iheyensis[1]; Oceanobacillus iheyensis HTE831[1]
Bifidobacterium longum	NC_000911	59.95	2.42	Bacteria[7918]; Actinobacteria[1198]; Actinobacteria[1134]; Bifidobacteriales[55]; Bifidobacteriaceae[55]; Bifidobacterium[49]; Bifidobacterium longum[1]
Leptospira interrogans serovar Lai str. 56601	NC_000912	35.04	4.71	Bacteria[7918]; Spirochaetes[84]; Leptospirales[24]; Leptospiraceae[24]; Leptospira[22]; Leptospira interrogans[1]; Leptospira interrogans serovar Lai[1]; Leptospira interrogans serovar Lai str. 56601[1]
Wigglesworthia glossinidia endosymbiont of Glossina brevipalpis	NC_000913	22.55	0.73	Bacteria[7918]; Proteobacteria[2718]; Gammaproteobacteria[1183]; Enterobacteriales[232]; Enterobacteriaceae[232]; Wigglesworthia[1];Wigglesworthia glossinidia[1]; Wigglesworthia glossinidia endosymbiont of Glossina brevipalpis[1]
Shewanella oneidensis MR-1	NC_000914	45.93	5.13	Bacteria[7918]; Proteobacteria[2718]; Gammaproteobacteria[1183]; Alteromonadales[127]; Shewanellaceae[23]; Shewanella[23]; Shewanella oneidensis[1]; Shewanella oneidensis MR-1[1]
Bradyrhizobium diazoefficiens	NC_000915	64.04	9.11	Bacteria[7918]; Proteobacteria[2718]; Alphaproteobacteria[828]; Rhizobiales[257]; Bradyrhizobiaceae[34]; Bradyrhizobium[16]; Bradyrhizobium diazoefficiens[1]
Pectobacterium atrosepticum	NC_000916	51.05	5.02	Bacteria[7918]; Proteobacteria[2718]; Gammaproteobacteria[1183]; Enterobacteriales[232]; Enterobacteriaceae[232]; Pectobacterium[5]; Pectobacterium atrosepticum[1]
Chlamydophila abortus	NC_000917	39.94	1.14	Bacteria[7918]; Chlamydiae[25]; Chlamydiales[23]; Chlamydiaceae[13]; Chlamydia/Chlamydophila group[13]; Chlamydophila[3]; Chlamydophila abortus[1]
Tropheryma whipplei str. Twist	NC_000918	46.32	0.93	Bacteria[7918]; Actinobacteria[1198]; Actinobacteria[1134]; Micrococcales[235]; Tropheryma[1]; Tropheryma whipplei[1]; Tropheryma whipplei str. Twist[1]
Enterococcus faecalis	NC_000919	37.31	3.03	Bacteria[7918]; Firmicutes[1539]; Bacilli[805]; Lactobacillales[356]; Enterococcaceae[36]; Enterococcus[29]; Enterococcus faecalis[1]
Nitrosomonas europaea ATCC 19718	NC_000920	50.76	2.81	Bacteria[7918]; Proteobacteria[2718]; Betaproteobacteria[435]; Nitrosomonadales[11]; Nitrosomonadaceae[10]; Nitrosomonas[6]; Nitrosomonas europaea[1]; Nitrosomonas europaea ATCC 19718[1]
Rhodopirellula baltica SH 1	NC_000921	55.45	7.14	Bacteria[7918]; Planctomycetes[35]; Planctomycetia[23]; Planctomycetales[18]; Planctomycetaceae[16]; Rhodopirellula[6]; Rhodopirellula baltica[1]; Rhodopirellula baltica SH 1[1]
Candidatus Blochmannia floridanus	NC_000922	27.42	0.74	Bacteria[7918]; Proteobacteria[2718]; Gammaproteobacteria[1183]; Enterobacteriales[232]; Enterobacteriaceae[232]; ant endosymbionts[7];Candidatus Blochmannia[6]; Candidatus Blochmannia floridanus[1]
Chromobacterium violaceum	NC_000923	64.85	4.76	Bacteria[7918]; Proteobacteria[2718]; Betaproteobacteria[435]; Neisseriales[58]; Chromobacteriaceae[26]; Chromobacterium[6]; Chromobacterium violaceum[1]
Wolinella succinogenes DSM 1740	NC_000924	48.54	2.11	Bacteria[7918]; Proteobacteria[2718]; Epsilonproteobacteria[79]; Campylobacterales[73]; Helicobacteraceae[36]; Wolinella[1]; Wolinella succinogenes[1]; Wolinella succinogenes DSM 1740[1]
Gloeobacter violaceus	NC_000925	62.03	4.66	Bacteria[7918]; Cyanobacteria[113]; Gloeobacteria[2]; Gloeobacterales[2]; Gloeobacter[2]; Gloeobacter violaceus[1]
Photorhabdus luminescens subsp. laumondii TTO1	NC_000926	42.84	5.69	Bacteria[7918]; Proteobacteria[2718]; Gammaproteobacteria[1183]; Enterobacteriales[232]; Enterobacteriaceae[232]; Photorhabdus[4]; Photorhabdus luminescens[1]; Photorhabdus luminescens subsp. laumondii[1]; Photorhabdus luminescens subsp. laumondii TTO1[1]
Rhodopseudomonas palustris CGA009	NC_000927	64.99	5.46	Bacteria[7918]; Proteobacteria[2718]; Alphaproteobacteria[828]; Rhizobiales[257]; Bradyrhizobiaceae[34]; Rhodopseudomonas[2]; Rhodopseudomonas palustris[1]; Rhodopseudomonas palustris CGA009[1]
Onion yellows phytoplasma OY-M	NC_000928	27.81	0.85	Bacteria[7918]; Tenericutes[142]; Mollicutes[142]; Acholeplasmatales[29]; Acholeplasmataceae[27]; Candidatus Phytoplasma[16]; Candidatus Phytoplasma asteris[5]; Onion yellows phytoplasma[1]; Onion yellows phytoplasma OY-M[1]
Picrophilus torridus DSM 9790	NC_000929	36.05	1.55	Archaea[516]; Euryarchaeota[322]; Thermoplasmata[23]; Thermoplasmatales[15]; Picrophilaceae[1]; Picrophilus[1]; Picrophilus torridus[1];Picrophilus torridus DSM 9790[1]
Bartonella henselae	NC_000930	38.22	1.93	Bacteria[7918]; Proteobacteria[2718]; Alphaproteobacteria[828]; Rhizobiales[257]; Bartonellaceae[27]; Bartonella[27]; Bartonella henselae[1]
Mesoplasma florum L1	NC_000931	27.12	0.79	Bacteria[7918]; Tenericutes[142]; Mollicutes[142]; Entomoplasmatales[26]; Entomoplasmataceae[10]; Mesoplasma[6]; Mesoplasma florum[1]; Mesoplasma florum L1[1]
Propionibacterium acnes KPA171202	NC_000932	60.06	2.56	Bacteria[7918]; Actinobacteria[1198]; Actinobacteria[1134]; Propionibacteriales[40]; Propionibacteriaceae[18]; Propionibacterium[11]; Propionibacterium acnes[1]; Propionibacterium acnes KPA171202[1]
Leifsonia xyli subsp. xyli str. CTCB07	NC_000933	67.72	2.58	Bacteria[7918]; Actinobacteria[1198]; Actinobacteria[1134]; Micrococcales[235]; Microbacteriaceae[72]; Leifsonia[4]; Leifsonia xyli[1]; Leifsonia xyli subsp. xyli[1]; Leifsonia xyli subsp. xyli str. CTCB07[1]
Desulfotalea psychrophila	NC_000934	46.62	3.66	Bacteria[7918]; Proteobacteria[2718]; Deltaproteobacteria[171]; Desulfobacterales[35]; Desulfobulbaceae[10]; Desulfotalea[1]; Desulfotalea psychrophila[1]
Symbiobacterium thermophilum IAM 14863	NC_000935	68.74	3.56	Bacteria[7918]; Firmicutes[1539]; Clostridia[545]; Clostridiales[459]; Symbiobacteriaceae[1]; Symbiobacterium[1]; Symbiobacterium thermophilum[1]; Symbiobacterium thermophilum IAM 14863[1]
Mannheimia succiniciproducens MBEL55E	NC_000936	42.52	2.31	Bacteria[7918]; Proteobacteria[2718]; Gammaproteobacteria[1183]; Pasteurellales[41]; Pasteurellaceae[41]; Basfia[1]; [Mannheimia] succiniciproducens[1]; Mannheimia succiniciproducens MBEL55E[1]
Nocardia farcinica IFM 10152	NC_000937	70.66	6.29	Bacteria[7918]; Actinobacteria[1198]; Actinobacteria[1134]; Corynebacteriales[257]; Nocardiaceae[56]; Nocardia[34]; Nocardia farcinica[1]; Nocardia farcinica IFM 10152[1]
Thermus thermophilus HB8	NC_000938	69.48	2.12	Bacteria[7918]; Deinococcus-Thermus[47]; Deinococci[46]; Thermales[23]; Thermaceae[23]; Thermus[14]; Thermus thermophilus[1];Thermus thermophilus HB8[1]
Geobacillus kaustophilus HTA426	NC_000939	52.11	3.54	Bacteria[7918]; Firmicutes[1539]; Bacilli[805]; Bacillales[448]; Bacillaceae[218]; Geobacillus[13]; Geobacillus kaustophilus[1]; Geobacillus kaustophilus HTA426[1]
Idiomarina loihiensis L2TR	NC_000940	47.04	2.84	Bacteria[7918]; Proteobacteria[2718]; Gammaproteobacteria[1183]; Alteromonadales[127]; Idiomarinaceae[10]; Idiomarina[9]; Idiomarina loihiensis[1]; Idiomarina loihiensis L2TR[1]
Aromatoleum aromaticum	NC_000941	64.68	4.73	Bacteria[7918]; Proteobacteria[2718]; Betaproteobacteria[435]; Rhodocyclales[23]; Rhodocyclaceae[23]; Aromatoleum[1]; Aromatoleum aromaticum[1]
Zymomonas mobilis subsp. mobilis ZM4	NC_000942	46.37	2.06	Bacteria[7918]; Proteobacteria[2718]; Alphaproteobacteria[828]; Sphingomonadales[81]; Sphingomonadaceae[57]; Zymomonas[1];Zymomonas mobilis[1]; Zymomonas mobilis subsp. mobilis[1]; Zymomonas mobilis subsp. mobilis ZM4 = ATCC 31821[1]
Francisella tularensis	NC_000943	32.32	1.89	Bacteria[7918]; Proteobacteria[2718]; Gammaproteobacteria[1183]; Thiotrichales[40]; Francisellaceae[6]; Francisella[6]; Francisella tularensis[2]
Thermococcus kodakarensis KOD1	NC_000944	52.06	2.14	Archaea[516]; Euryarchaeota[322]; Thermococci[25]; Thermococcales[25]; Thermococcaceae[24]; Thermococcus[17]; Thermococcus kodakarensis[1]; Thermococcus kodakarensis KOD1[1]
Gluconobacter oxydans 621H	NC_000945	60.84	2.92	Bacteria[7918]; Proteobacteria[2718]; Alphaproteobacteria[828]; Rhodospirillales[107]; Acetobacteraceae[62]; Gluconobacter[4]; Gluconobacter oxydans[1]; Gluconobacter oxydans 621H[1]
Lactobacillus acidophilus NCFM	NC_000946	34.74	1.99	Bacteria[7918]; Firmicutes[1539]; Bacilli[805]; Lactobacillales[356]; Lactobacillaceae[182]; Lactobacillus[170]; Lactobacillus acidophilus[1]; Lactobacillus acidophilus NCFM[1]
Sulfolobus acidocaldarius DSM 639	NC_000947	36.75	2.23	Archaea[516]; Crenarchaeota[73]; Thermoprotei[58]; Sulfolobales[14]; Sulfolobaceae[12]; Sulfolobus[6]; Sulfolobus acidocaldarius[1];Sulfolobus acidocaldarius DSM 639[1]
Psychrobacter arcticus 273-4	NC_000948	42.83	2.65	Bacteria[7918]; Proteobacteria[2718]; Gammaproteobacteria[1183]; Pseudomonadales[158]; Moraxellaceae[52]; Psychrobacter[9];Psychrobacter arcticus[1]; Psychrobacter arcticus 273-4[1]
Dechloromonas aromatica	NC_000949	59.24	4.5	Bacteria[7918]; Proteobacteria[2718]; Betaproteobacteria[435]; Rhodocyclales[23]; Rhodocyclaceae[23]; Dechloromonas[3]; Dechloromonas aromatica[1]
Thermobifida fusca YX	NC_000950	67.54	3.64	Bacteria[7918]; Actinobacteria[1198]; Actinobacteria[1134]; Streptosporangiales[50]; Nocardiopsaceae[23]; Thermobifida[2]; Thermobifida fusca[1]; Thermobifida fusca YX[1]
Ralstonia eutropha JMP134	NC_000951	64.45	7.25	Bacteria[7918]; Proteobacteria[2718]; Betaproteobacteria[435]; Burkholderiales[275]; Burkholderiaceae[99]; Cupriavidus[8]; Cupriavidus pinatubonensis[1]; Ralstonia eutropha JMP134[1]
Ehrlichia canis	NC_000952	29.06	1.31	Bacteria[7918]; Proteobacteria[2718]; Alphaproteobacteria[828]; Rickettsiales[85]; Anaplasmataceae[35]; Ehrlichia[6]; canis group[5]; Ehrlichia canis[1]
Thiobacillus denitrificans ATCC 25259	NC_000953	66.15	2.91	Bacteria[7918]; Proteobacteria[2718]; Betaproteobacteria[435]; Hydrogenophilales[4]; Hydrogenophilaceae[4]; Thiobacillus[2]; Thiobacillus denitrificans[1]; Thiobacillus denitrificans ATCC 25259[1]
Nitrobacter winogradskyi Nb-255	NC_000954	62.09	3.41	Bacteria[7918]; Proteobacteria[2718]; Alphaproteobacteria[828]; Rhizobiales[257]; Bradyrhizobiaceae[34]; Nitrobacter[3]; Nitrobacter winogradskyi[1]; Nitrobacter winogradskyi Nb-255[1]
Pseudoalteromonas haloplanktis TAC125	NC_000955	40.068	3.85	Bacteria[7918]; Proteobacteria[2718]; Gammaproteobacteria[1183]; Alteromonadales[127]; Pseudoalteromonadaceae[26]; Pseudoalteromonas[25]; Pseudoalteromonas haloplanktis[1]; Pseudoalteromonas haloplanktis TAC125[1]
Rhodobacter sphaeroides 2.4.1	NC_000956	68.78	4.62	Bacteria[7918]; Proteobacteria[2718]; Alphaproteobacteria[828]; Rhodobacterales[195]; Rhodobacteraceae[171]; Rhodobacter[5]; Rhodobacter sphaeroides[1]; Rhodobacter sphaeroides 2.4.1[1]
Pelobacter carbinolicus DSM 2380	NC_000957	55.15	3.67	Bacteria[7918]; Proteobacteria[2718]; Deltaproteobacteria[171]; Desulfuromonadales[19]; Pelobacteraceae[3]; Pelobacter[3]; Pelobacter carbinolicus[1]; Pelobacter carbinolicus DSM 2380[1]
Carboxydothermus hydrogenoformans	NC_000958	42.31	2.43	Bacteria[7918]; Firmicutes[1539]; Clostridia[545]; Thermoanaerobacterales[47]; Thermoanaerobacteraceae[26]; Carboxydothermus[2]; Carboxydothermus hydrogenoformans[1]
Chlorobium luteolum DSM 273	NC_000959	57.34	2.36	Bacteria[7918]; Chlorobi[13]; Chlorobia[12]; Chlorobiales[12]; Chlorobiaceae[12]; Chlorobium/Pelodictyon group[8]; Pelodictyon[2]; Pelodictyon luteolum[1]; Chlorobium luteolum DSM 273[1]
Synechococcus	NC_000960	57.62	2.66	Bacteria[7918]; Cyanobacteria[113]; Oscillatoriophycideae[64]; Chroococcales[28]; Synechococcus[3]
Geobacter metallireducens GS-15	NC_000961	59.64	3.89	Bacteria[7918]; Proteobacteria[2718]; Deltaproteobacteria[171]; Desulfuromonadales[19]; Geobacteraceae[14]; Geobacter[11]; Geobacter metallireducens[1]
Desulfovibrio alaskensis	NC_000962	57.93	3.64	Bacteria[7918]; Proteobacteria[2718]; Deltaproteobacteria[171]; Desulfovibrionales[46]; Desulfovibrionaceae[33]; Desulfovibrio[29]; Desulfovibrio alaskensis[1]
Thiomicrospira crunogena XCL-2	NC_000963	43.14	2.42	Bacteria[7918]; Proteobacteria[2718]; Gammaproteobacteria[1183]; Thiotrichales[40]; Piscirickettsiaceae[20]; Thiomicrospira[7];Thiomicrospira crunogena[1]; Thiomicrospira crunogena XCL-2[1]
Synechococcus elongatus PCC 7942	NC_000964	55.46	2.74	Bacteria[7918]; Cyanobacteria[113]; Oscillatoriophycideae[64]; Chroococcales[28]; Synechococcus[3]; Synechococcus elongatus[1];Synechococcus elongatus PCC 7942[1]
Shigella boydii Sb227	NC_000965	51.12	4.64	Bacteria[7918]; Proteobacteria[2718]; Gammaproteobacteria[1183]; Enterobacteriales[232]; Enterobacteriaceae[232]; Shigella[5]; Shigella boydii[1]; Shigella boydii Sb227[1]
Nitrosospira multiformis ATCC 25196	NC_000966	53.83	3.23	Bacteria[7918]; Proteobacteria[2718]; Betaproteobacteria[435]; Nitrosomonadales[11]; Nitrosomonadaceae[10]; Nitrosospira[4]; Nitrosospira multiformis[1]; Nitrosospira multiformis ATCC 25196[1]
Brucella abortus	NC_000967	57.23	3.29	Bacteria[7918]; Proteobacteria[2718]; Alphaproteobacteria[828]; Rhizobiales[257]; Brucellaceae[16]; Brucella[11]; Brucella abortus[1]
Magnetospirillum magneticum AMB-1	NC_000968	65.51	4.97	Bacteria[7918]; Proteobacteria[2718]; Alphaproteobacteria[828]; Rhodospirillales[107]; Rhodospirillaceae[41]; Magnetospirillum[4]; Magnetospirillum magneticum[1]; Magnetospirillum magneticum AMB-1[1]
Mycoplasma capricolum subsp. capricolum ATCC 27343	NC_000969	23.82	1.01	Bacteria[7918]; Tenericutes[142]; Mollicutes[142]; Mycoplasmataceae[85]; Mycoplasma[77]; Mycoplasma mycoides group[4]; Mycoplasma capricolum[1]; Mycoplasma capricolum subsp. capricolum[1]; Mycoplasma capricolum subsp. capricolum ATCC 27343[1]
Rhodospirillum rubrum ATCC 11170	NC_000970	65.33	4.43	Bacteria[7918]; Proteobacteria[2718]; Alphaproteobacteria[828]; Rhodospirillales[107]; Rhodospirillaceae[41]; Rhodospirillum[3];Rhodospirillum rubrum[1]; Rhodospirillum rubrum ATCC 11170[1]
Moorella thermoacetica ATCC 39073	NC_000971	55.84	2.63	Bacteria[7918]; Firmicutes[1539]; Clostridia[545]; Thermoanaerobacterales[47]; Thermoanaerobacteraceae[26]; Moorella group[4]; Moorella[3]; Moorella thermoacetica[1]; Moorella thermoacetica ATCC 39073[1]
Hahella chejuensis KCTC 2396	NC_000972	53.91	7.21	Bacteria[7918]; Proteobacteria[2718]; Gammaproteobacteria[1183]; Oceanospirillales[87]; Hahellaceae[7]; Hahella[2]; Hahella chejuensis[1]; Hahella chejuensis KCTC 2396[1]
Salinibacter ruber DSM 13855	NC_000973	66.11	3.58	Bacteria[7918]; Bacteroidetes[581]; Bacteroidetes Order II. Incertae sedis[6]; Rhodothermaceae[6]; Salinibacter[2]; Salinibacter ruber[1];Salinibacter ruber DSM 13855[1]
Sodalis glossinidius str. 'morsitans'	NC_000974	54.52	4.32	Bacteria[7918]; Proteobacteria[2718]; Gammaproteobacteria[1183]; Enterobacteriales[232]; Enterobacteriaceae[232]; Sodalis[4]; Sodalis glossinidius[1]; Sodalis glossinidius str. 'morsitans'[1]
Aster yellows witches'-broom phytoplasma AYWB	NC_000975	26.82	0.72	Bacteria[7918]; Tenericutes[142]; Mollicutes[142]; Acholeplasmatales[29]; Acholeplasmataceae[27]; Candidatus Phytoplasma[16];Candidatus Phytoplasma asteris[5]; Aster yellows witches'-broom phytoplasma[1]; Aster yellows witches'-broom phytoplasma AYWB[1]
Erythrobacter litoralis	NC_000976	64.15	3.13	Bacteria[7918]; Proteobacteria[2718]; Alphaproteobacteria[828]; Sphingomonadales[81]; Erythrobacteraceae[19]; Erythrobacter[7]; Erythrobacter litoralis[1]
Rhizobium etli CFN 42	NC_000977	60.05	6.53	Bacteria[7918]; Proteobacteria[2718]; Alphaproteobacteria[828]; Rhizobiales[257]; Rhizobiaceae[47]; Rhizobium/Agrobacterium group[30];Rhizobium[20]; Rhizobium etli[1]; Rhizobium etli CFN 42[1]
Frankia	NC_000978	71.21	7.58	Bacteria[7918]; Actinobacteria[1198]; Actinobacteria[1134]; Frankiales[5]; Frankiaceae[3]; Frankia[3]
Novosphingobium aromaticivorans DSM 12444	NC_000979	65.15	4.23	Bacteria[7918]; Proteobacteria[2718]; Alphaproteobacteria[828]; Sphingomonadales[81]; Sphingomonadaceae[57]; Novosphingobium[12]; Novosphingobium aromaticivorans[1]; Novosphingobium aromaticivorans DSM 12444[1]
Staphylococcus aureus subsp. aureus NCTC 8325	NC_000980	32.82	2.81	Bacteria[7918]; Firmicutes[1539]; Bacilli[805]; Bacillales[448]; Staphylococcaceae[48]; Staphylococcus[37]; Staphylococcus aureus[1]; Staphylococcus aureus subsp. aureus[1]; Staphylococcus aureus subsp. aureus NCTC 8325[1]
Methanococcus maripaludis C7	NC_000981	33.31	1.77	Archaea[516]; Euryarchaeota[322]; Methanococci[15]; Methanococcales[15]; Methanococcaceae[6]; Methanococcus[4]; Methanococcus maripaludis[1]; Methanococcus maripaludis C7[1]
Halobacterium salinarum R1	NC_000982	65.69	2.67	Archaea[516]; Euryarchaeota[322]; Halobacteria[129]; Halobacteriales[40]; Halobacteriaceae[36]; Halobacterium[3]; Halobacterium salinarum[1]; Halobacterium salinarum R1[1]
Anaplasma marginale	NC_000983	49.84	1.18	Bacteria[7918]; Proteobacteria[2718]; Alphaproteobacteria[828]; Rickettsiales[85]; Anaplasmataceae[35]; Anaplasma[3]; Anaplasma marginale[1]
Bordetella bronchiseptica	NC_000984	68.23	5.26	Bacteria[7918]; Proteobacteria[2718]; Betaproteobacteria[435]; Burkholderiales[275]; Alcaligenaceae[34]; Bordetella[10]; Bordetella bronchiseptica[1]
Xanthomonas citri subsp. citri Aw12879	NC_000985	64.66	5.42	Bacteria[7918]; Proteobacteria[2718]; Gammaproteobacteria[1183]; Xanthomonadales[82]; Xanthomonadaceae[66]; Xanthomonas[21];Xanthomonas citri group[2]; Xanthomonas citri[1]; Xanthomonas citri subsp. citri[1]; Xanthomonas citri subsp. citri Aw12879[1]

## Sheet: Table S2
Table S2. Genomes information in testing dataset
Species	GenBank accession number	GC content	Size（Mb）	Lineage
Archaeoglobus fulgidus DSM 4304	NC_000917	48.6	2.18	Archaea[521]; Euryarchaeota[326]; Archaeoglobi[7]; Archaeoglobales[7]; Archaeoglobaceae[7]; Archaeoglobus[4]; Archaeoglobus fulgidus[1]; Archaeoglobus fulgidus DSM 4304[1]
Natronomonas pharaonis DSM 2160	NC_007426	63.18	2.75	Archaea[521]; Euryarchaeota[326]; Halobacteria[129]; Halobacteriales[40]; Halobacteriaceae[36]; Natronomonas[2]; Natronomonas pharaonis[1]; Natronomonas pharaonis DSM 2160[1]
Methanocaldococcus jannaschii DSM 2661	NC_000909	31.3	1.74	Archaea[570]; Euryarchaeota[366]; Methanococci[15]; Methanococcales[15]; Methanocaldococcaceae[9]; Methanocaldococcus[7];Methanocaldococcus jannaschii[1]; Methanocaldococcus jannaschii DSM 2661[1]
Buchnera aphidicola str. APS	NC_002528	26.35	0.656	Bacteria[8012]; Proteobacteria[2739]; Gammaproteobacteria[1185]; Enterobacteriales[233]; Enterobacteriaceae[233]; Buchnera[1];Buchnera aphidicola[1]; Buchnera aphidicola (Acyrthosiphon pisum)[1]; Buchnera aphidicola str. APS (Acyrthosiphon pisum)[1]
Burkholderia pseudomallei K96243	NC_006350	68	7.25	Bacteria[8012]; Proteobacteria[2739]; Betaproteobacteria[438]; Burkholderiales[278]; Burkholderiaceae[99]; Burkholderia[68]; pseudomallei group[5]; Burkholderia pseudomallei[1]; Burkholderia pseudomallei K96243[1]
Bacillus subtilis	NC_000964	43.7	4.1	Bacteria[8012]; Firmicutes[1547]; Bacilli[807]; Bacillales[450]; Bacillaceae[217]; Bacillus[110]; Bacillus subtilis group[12]; Bacillus subtilis[1]
Corynebacterium jeikeium K411	NC_007164	61.4	2.5	Bacteria[8012]; Actinobacteria[1225]; Actinobacteria[1161]; Corynebacteriales[264]; Corynebacteriaceae[75]; Corynebacterium[73];Corynebacterium jeikeium[1]; Corynebacterium jeikeium K411[1]
Chlorobium tepidum TLS	NC_002932	56.5	2.15	Bacteria[8012]; Chlorobi[17]; Chlorobia[12]; Chlorobiales[12]; Chlorobiaceae[12]; Chlorobaculum[2]; Chlorobaculum tepidum[1]; Chlorobium tepidum TLS[1]
Escherichia coli str. K-12 substr. MG1655	NC_000913	50.8	4.6	Bacteria[8012]; Proteobacteria[2739]; Gammaproteobacteria[1185]; Enterobacteriales[233]; Enterobacteriaceae[233]; Escherichia[6];Escherichia coli[1]; Escherichia coli K-12[1]; Escherichia coli str. K-12 substr. MG1655[1]
Helicobacter pylori 26695	NC_000921	38.9	1.67	Bacteria[8012]; Proteobacteria[2739]; Epsilonproteobacteria[81]; Campylobacterales[75]; Helicobacteraceae[36]; Helicobacter[27];Helicobacter pylori[1]; Helicobacter pylori 26695[1]
Pseudomonas aeruginosa PAO1	NC_002516	66.6	6.26	Bacteria[8012]; Proteobacteria[2739]; Gammaproteobacteria[1185]; Pseudomonadales[162]; Pseudomonadaceae[108]; Pseudomonas[97];Pseudomonas aeruginosa group[9]; Pseudomonas aeruginosa[1]; Pseudomonas aeruginosa PAO1[1]
Prochlorococcus marinus subsp. marinus str. CCMP1375	NC_007577	36.4	1.75	Bacteria[8012]; Cyanobacteria[113]; Prochlorales[4]; Prochlorococcaceae[2]; Prochlorococcus[2]; Prochlorococcus marinus[1];Prochlorococcus marinus subsp. marinus[1]; Prochlorococcus marinus subsp. marinus str. CCMP1375[1]
Wolbachia endosymbiont strain TRS of Brugia malayi	NC_006833	34.2	1.08	Bacteria[8012]; Proteobacteria[2739]; Alphaproteobacteria[831]; Rickettsiales[85]; Anaplasmataceae[35]; Wolbachieae[21]; Wolbachia[21];Wolbachia endosymbiont of Brugia malayi[1]; Wolbachia endosymbiont strain TRS of Brugia malayi[1]

## Sheet: Table S3
Table S3: TPR, PPV and F1 score of Meta-MFDL, Meta-MFSVM, Orphelia, FragGeneScan, MGC and MetaGUN on the TesData700 independent testing dataset
Species		Orphelia			Meta-MFSVM			FragGeneScan			MGC			MetaGUN			Meta-MFDL
		TPR(%)	PPV(%)	F1	TPR(%)	PPV(%)	F1	TPR(%)	PPV(%)	F1	TPR(%)	PPV(%)	F1	TPR(%)	PPV(%)	F1	TPR(%)	PPV(%)	F1
A.fulgidus		83.87	90.95	0.8727	90.49	91.37	0.9093	90.36	93.46	0.9188	91.29	91.54	0.9232	91.06	95.48	0.9322	91.65	95.82	0.9369
N.pharaonis		78.32	84.37	0.8123	83.65	91.61	0.8745	92.56	88.27	0.9039	83.47	91.58	0.8749	89.86	96.64	0.9313	89.32	96.07	0.9257
M.jannaschii		81.08	85.7	0.8332	88.97	91.34	0.9014	94.12	96.23	0.9516	89.07	91.29	0.9017	92.18	96.04	0.9407	91.33	95.96	0.9379
B.aphidicola		90.05	95.43	0.9266	90.23	93.52	0.9198	97.16	92.48	0.9476	91.16	93.41	0.9227	94.2	96.53	0.9535	93.48	96.75	0.9509
B.pseudomallei		85.47	85.72	0.8559	85.73	91.12	0.8834	94.26	86.35	0.9013	85.8	91.68	0.8815	90.99	94.51	0.9272	90.96	95.59	0.9274
B.subtilis		87.43	92.11	0.8971	86.92	93.01	0.8986	96.93	86.76	0.9156	86.97	93.03	0.899	89.73	95.38	0.9247	89.76	95.44	0.9251
C.jeikeium		81.97	86.86	0.8423	85.56	92.46	0.8889	93.2	88.49	0.9078	86.9	92.71	0.8971	86.55	94.03	0.9014	86.37	94.92	0.9044
C.tepidum		74.53	84.36	0.7915	85.71	86.58	0.8614	82.55	88.13	0.8525	85.88	86.35	0.8611	84.99	92.1	0.884	84.86	92.16	0.8814
E.coli		86.24	90.62	0.8838	85.59	92.47	0.889	96.13	87.59	0.9166	85.69	92.56	0.89	87.51	94.94	0.9108	87.42	95.26	0.9117
H.pylori		90.54	90.39	0.9046	87.53	94.15	0.9072	96.57	90.59	0.9348	88.06	94.08	0.9098	89.7	93.44	0.8153	88.38	96.54	0.9228
P.aeruginosa		83.4	81.86	0.8262	89.56	92.49	0.9103	93.41	93.48	0.9344	89.69	92.41	0.9103	91.33	94.47	0.9288	90.4	94.94	0.9261
P.marinus		86.09	89.16	0.876	85.78	94.04	0.8972	90.5	89.03	0.8976	85.91	94.15	0.8984	89.85	95.8	0.9273	87.86	96.43	0.9195
W.endosymbion		76.34	78.32	0.7732	76.94	89.76	0.8286	93.27	68.23	0.7881	76.94	89.93	0.8293	79.84	85.28	0.8247	86.53	87.03	0.8678
Average		84.17	88.1	0.8536	86.38	91.84	0.8903	93.16	88.39	0.9079	86.7	91.9	0.8922	89.06	94.2	0.9155	89.1	94.76	0.9184

## Sheet: Table S4
Table S4: TPR, PPV and F1 score of Meta-MFDL, Meta-MFSVM, Orphelia, FragGeneScan, MGC and MetaGUN on the TesData120 independent testing dataset
Species		Orphelia			Meta-MFSVM			FragGeneScan			MGC			MetaGUN			Meta-MFDL
		TPR(%)	PPV(%)	F1	TPR(%)	PPV(%)	F1	TPR(%)	PPV(%)	F1	TPR(%)	PPV(%)	F1	TPR(%)	PPV(%)	F1	TPR(%)	PPV(%)	F1
A.fulgidus		83.26	84.12	0.8369	84.55	85.21	0.8488	85.53	85.73	0.8564	85.05	85.65	0.8535	86.15	86.29	0.8606	87.81	86.65	0.8723
N.pharaonis		81.24	81.46	0.8135	81.65	81.84	0.8174	81.64	82.12	0.8188	81.97	82.05	0.8192	81.82	82.29	0.8206	82.01	82.02	0.8202
M.jannaschii		79.26	81.87	0.8054	83.04	83.23	0.8314	83.84	83.67	0.8376	83.52	83.69	0.8361	84.22	84.18	0.842	84.53	84.63	0.8458
B.aphidicola		85.42	86.12	0.8577	87.08	87.69	0.8738	88.57	89.15	0.8887	87.88	88.34	0.8811	89.23	90.45	0.8983	89.89	90.09	0.9
B.pseudomallei		83.02	84.17	0.8359	83.61	84.55	0.8408	83.96	84.97	0.8446	83.78	84.72	0.843	84.16	85.31	0.8473	85.06	85.08	0.8506
B.subtilis		86.59	88.32	0.8745	86.93	88.49	0.8771	87.04	88.7	0.8786	87.02	88.61	0.8781	87.13	88.78	0.8795	87.31	87.26	0.8729
C.jeikeium		82.13	83.04	0.8258	84.84	84.64	0.8474	87.77	86.83	0.873	86.31	85.84	0.8607	89.61	87.7	0.8865	91.81	91.88	0.9185
C.tepidum		76.59	79.62	0.7808	77.19	81.1	0.7862	77.78	80.56	0.7915	77.54	80.46	0.7898	78.13	80.95	0.7952	78.55	78.53	0.7854
E.coli		83.53	84.16	0.8384	83.99	84.46	0.8423	84.54	84.95	0.847	84.36	84.7	0.8453	84.76	85.05	0.8491	84.94	84.89	0.8496
H.pylori		85.23	86.12	0.8567	86.92	87.54	0.8723	88.78	90.5	0.8963	88.33	89.2	0.8876	90.36	91.58	0.9097	91.23	91.53	0.9138
P.aeruginosa		81.47	83.24	0.8235	82.31	83.72	0.8301	82.91	84.32	0.8361	82.61	84.04	0.8332	83.28	84.63	0.8395	83.66	83.51	0.8359
P.marinus		86.17	88.96	0.8754	86.86	89.36	0.881	87.42	89.58	0.8849	87.16	89.51	0.8834	87.74	90.45	0.8908	88.32	88.17	0.8825
W.endosymbion		75.49	76.84	0.7616	77.86	78.01	0.7798	79.5	80.11	0.7981	78.89	79.31	0.7909	80.43	80.64	0.8053	80.82	80.89	0.8085
Average		82.26	83.7	0.8297	83.6	84.53	0.8406	84.56	85.47	0.8501	84.18	85.09	0.8463	85.16	86.02	0.8557	85.84	85.79	0.8582

## Sheet: Table S5
Table S5. Results of Meta-MFDL with different training data size
Sampling times		5000						10000						50000						80000						100000						150000						200000
		TPR	PPV	F1	ACC(%)	Running time(h)		TPR	PPV	F1	ACC(%)	Running time(h)		TPR	PPV	F1	ACC(%)	Running time(h)		TPR	PPV	F1	ACC(%)	Running time(h)		TPR(%)	PPV(%)	F1	ACC(%)	Running time(h)		TPR	PPV	F1	ACC(%)	Running time(h)		TPR	PPV	F1	ACC(%)	Running time(h)
1		90.59	90.25	0.9042	90.4	0.032		89.56	92.05	0.9076	90.9	0.041		89.32	93.36	0.913	91.5	0.334		91.23	93.02	0.9213	92.2	0.837		92.24	93.16	0.9269	92.7	1.025		92.3	93.02	0.9266	92.7	1.436		92.23	93.12	0.9267	92.7	1.837
2		88.2	89.13	0.8866	88.7	0.029		90.12	91.86	0.9089	91.1	0.042		89.46	92.28	0.9084	91	0.32		92.02	93.12	0.9257	92.6	0.826		92.21	93.05	0.9563	92.7	1.028		91.94	93.08	0.9251	92.5	1.457		91.95	93.14	0.9254	92.6	1.639
3		89.46	90.08	0.8977	89.8	0.03		90.84	89.76	0.903	90.2	0.04		91.42	92.12	0.9177	91.8	0.324		91.75	92.86	0.923	92.3	0.832		91.58	92.88	0.9222	92.3	1.024		91.86	92.74	0.923	92.4	1.448		91.65	93.76	0.9269	92.7	1.734
4		89.59	88.52	0.8905	89	0.03		90.37	91.46	0.9091	91	0.039		90.86	91.45	0.9225	91.2	0.337		91.78	92.03	0.9166	91.9	0.829		91.36	93.86	0.9259	92.7	1.026		91.78	93.85	0.928	92.9	1.45		91.88	92.77	0.9232	92.4	1.832
5		89.43	90.24	0.8983	89.6	0.031		90.94	89.78	0.904	90.3	0.041		91.03	91.32	0.9117	91.2	0.328		91.96	92.14	0.9205	92.1	0.834		91.96	93.12	0.9254	92.6	1.032		92.15	92.96	0.9252	92.5	1.458		92.14	93.12	0.9262	92.7	1.841
Average		89.45	89.64	0.8955	89.5	0.03		90.37	90.98	0.9049	90.7	0.041		90.42	92.12	0.9125	91.3	0.329		91.75	92.63	0.9213	92.2	0.832		91.48	93.21	0.9253	92.6	1.027		92	93.06	0.9255	92.7	1.45		92.17	93.18	0.9256	92.6	1.776
